# Supplementary figures and images for: Safety of Four COVID-19 Vaccines across Primary Doses 1, 2, 3 and Booster: A Prospective Cohort Study of Australian Community Pharmacy Vaccinations
Source: MDPI journal article supplement (doi:10.3390/vaccines10122017), 2022-11-25

Figure S1. Flow-chart of the study.

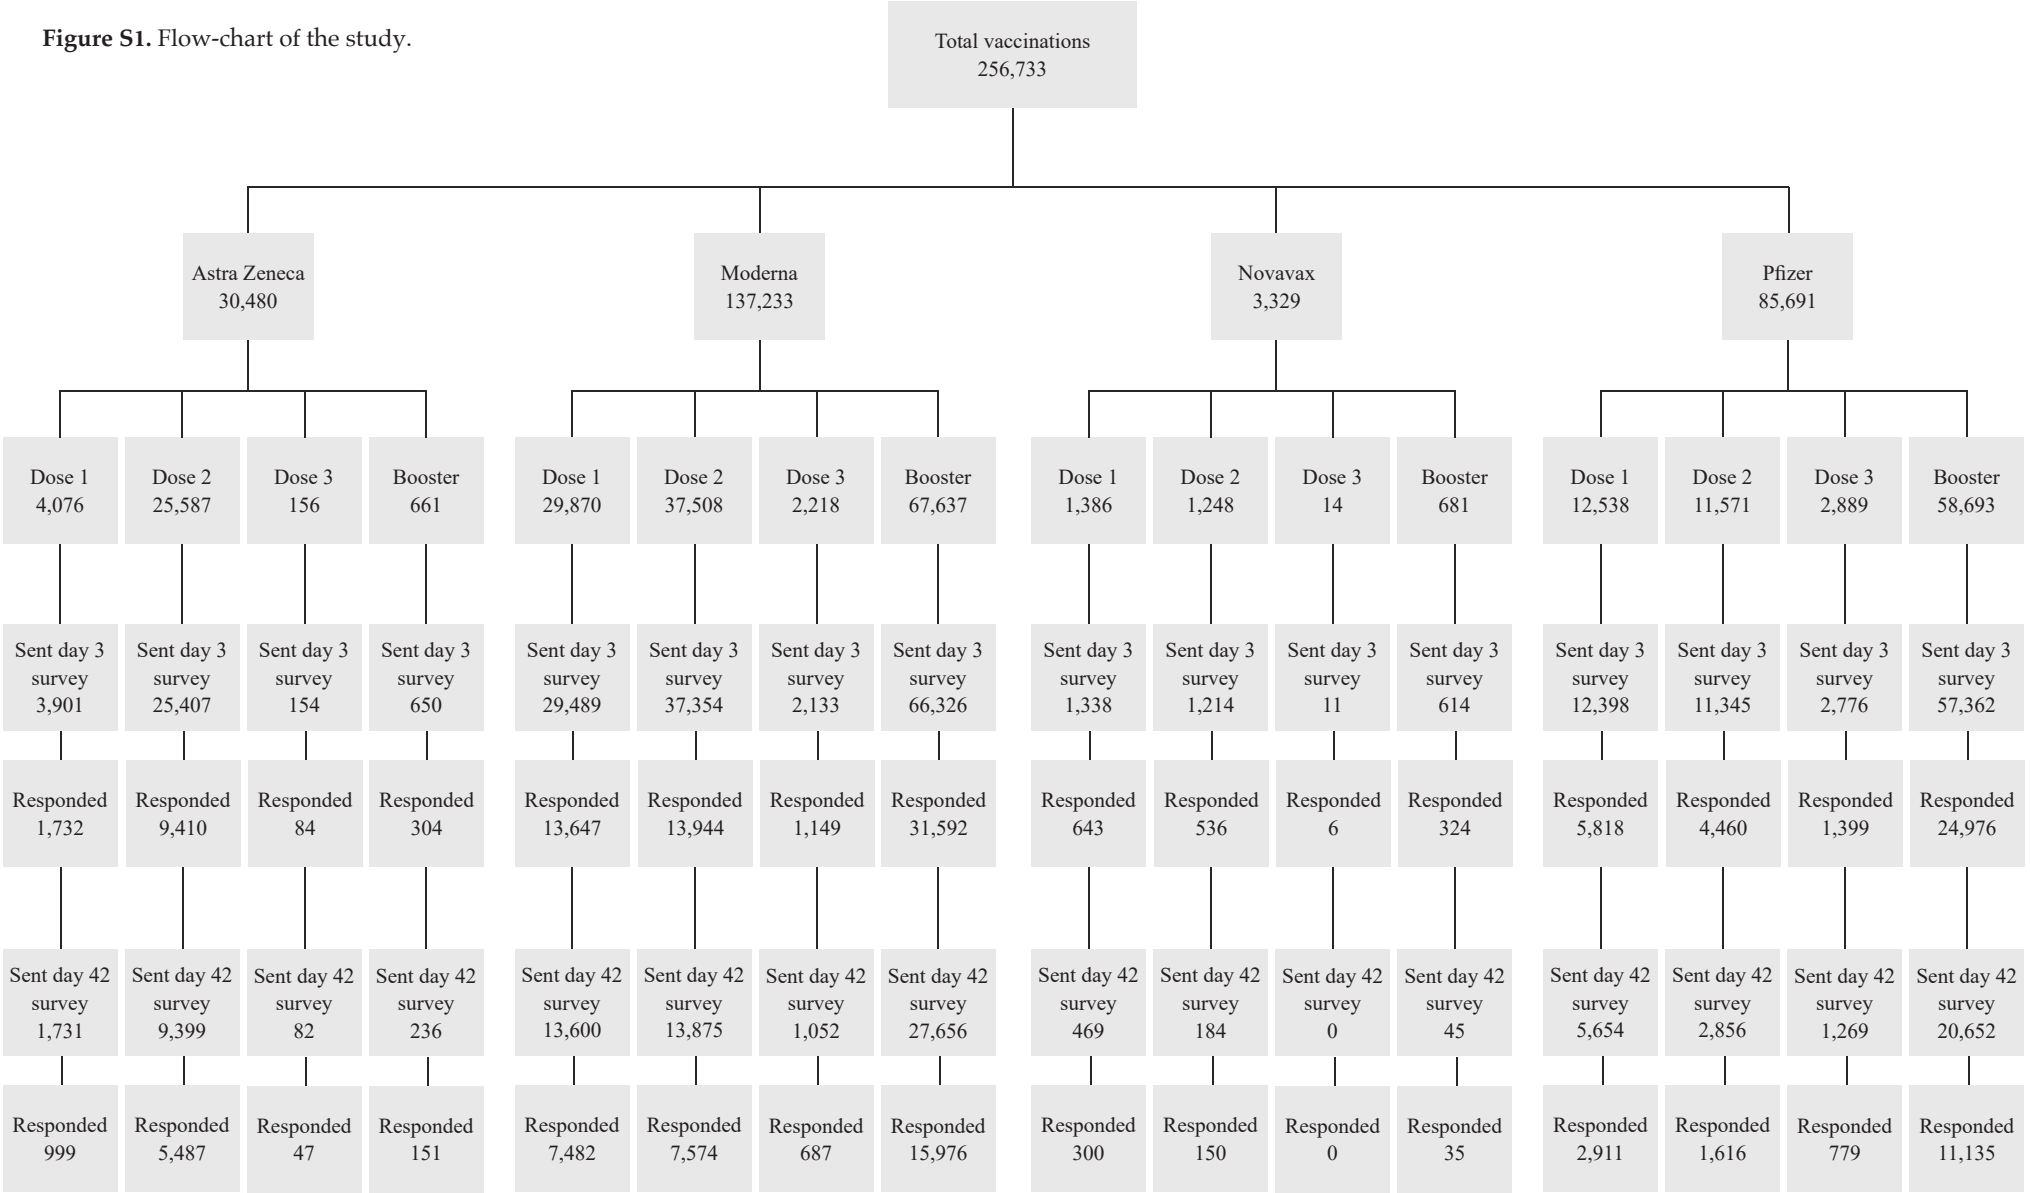

Supplement: s1 [file s1]
